# Supplementary material for: A Comparative Study of the Short Term Cold Resistance Response in Distantly Related Drosophila Species: The Role of regucalcin and Frost
Source: PubMed Central journal article supplement (PMC3184994; doi:10.1371/journal.pone.0025520), 2011-10-03
Supplement: pone.0025520.s001.pdf [file pone.0025520.s001.pdf]

**Supplementary Table 1.** *Frost* and *regucalcin* primers used for PCR amplification and sequencing

| Species                     | Region analysed                | Primers           |                    |                    |
|-----------------------------|--------------------------------|-------------------|--------------------|--------------------|
| <i>Drosophila americana</i> | <i>Frost</i>                   | FrostvirF         | CAATGACCMCYTGCTTTC |                    |
|                             |                                | FrostvirR         | TCTATCGGAACTGACRAT |                    |
|                             | <i>frost</i> cDNA              | Frost_PEST_F      | CAGAAGAGCCCGTAGAAA |                    |
|                             |                                | Frost_PEST_R      | GGTGCCTTGGTAGTCTCG |                    |
|                             |                                | Frost_cDNA_F      | CGTAATGGGGATAGATGG |                    |
|                             |                                | Frost_cDNA_R      | CGTAATGGGGATAGATGG |                    |
|                             |                                | <i>regucalcin</i> | DcaF               | ATTTTAGTTGGATTCTCG |
|                             |                                |                   | DcaR               | TTGTGCGTGTGCTTAGAT |
|                             | <i>regucalcin</i> cDNA         | Dca_amer_ex1      | TGATACCGAGGGCAACAT |                    |
|                             |                                | Dca_amer_ex2      | CGAAGGCAACCGAAGTGA |                    |
|                             | <i>RpL32</i> cDNA              | RpL32_RT_F        | ACAACAGAGTGCGTCGTC |                    |
|                             |                                | RpL32_RT_R        | ATCTCCTTGCGTTTCTTC |                    |
|                             | <i>Drosophila melanogaster</i> | <i>frost</i> cDNA | Dmel_Fst_F         | TCAGGGTCAGTGGGATGG |
|                             |                                |                   | Dmel_Fst_R         | CCGTTGGTGGTGGTGGAG |
| <i>regucalcin</i> cDNA      |                                | Dmel_Regucalcin_F | CCTGCTCCGCTACGACTA |                    |
|                             |                                | Dmel_Regucalcin_R | CGAGACGCCATCCCAGTT |                    |
| <i>RpL32</i> cDNA           |                                | Dmel_RpL32_F      | CGTTTACTGCGGCGAGAT |                    |
|                             |                                | Dmel_RpL32_R      | CGTTGGGGTTGGTGAGGC |                    |
